# Supplementary material for: Water Deficit-Responsive QTLs for Cell Wall Degradability and Composition in Maize at Silage Stage
Source: Front Plant Sci. 2019 Apr 25;10:488. doi: 10.3389/fpls.2019.00488 (PMC6494970; doi:10.3389/fpls.2019.00488)
Supplement: Supplemental Table S1 — Principal component analysis. [file Table_1.XLSX]

## Sheet: feuille 1
Supplemental Table 1. Principal component analysis.
Categories	Traitsa	Units	Component1 (42.14 %)				Component2 (21.84 %)				Component3 (16.01 %)
			contribution (%)	r	pvalue		contribution (%)	r	pvalue		contribution (%)	r	pvalue
Cell Wall residues	NDF	%DM	0.07	0.07	0.0121019		4.83	-0.45	5.49289e-60		17.43	0.73	6.63521e-198
Degradability	IVDMD	%DM	6.83	-0.74	2.583e-207		1.43	0.24	1.26939e-17		3.3	-0.32	2.80167e-29
	IVCWRD	%CWR	10.89	-0.93	0		0.43	-0.13	3.71611e-06		0.27	0.09	0.00161645
Lignin content	KL.CWR	%CWR	10.83	0.93	0		0.06	0.05	ns		1.29	-0.2	4.54126e-12
	ADL.NDF	%NDF	10.7	0.93	0		0.00048	0	ns		2.74	-0.29	2.13711e-24
Lignin structure	bO4	µmole g-1 KL	1.5	0.35	3.90135e-35		15.81	0.81	5.67415e-279		4.66	0.38	1.63321e-41
	bO4.H	µmole g-1 KL	1.26	-0.32	2.42849e-29		0.07	0.05	ns		21.52	0.81	8.73294e-278
	bO4.G	µmole g-1 KL	0.19	0.12	2.01973e-05		14.3	0.77	1.83817e-235		10.67	0.57	7.93601e-104
	bO4.S	µmole g-1 KL	3.03	0.49	4.68604e-74		13.43	0.75	1.69185e-213		0.6	0.14	2.62329e-06
	S/G		4.04	0.57	2.16891e-103		3.5e-06	0	ns		11.7	-0.6	3.65513e-116
p-Hydroxycinamic acids	PCAest	mg g-1 CWR	11.61	0.96	0		0.83	0.19	8.94742e-11		0.61	-0.14	2.37147e-06
	FAest	mg g-1 CWR	0.61	-0.22	1.07672e-14		17.2	0.84	0		3.33	-0.32	1.43548e-29
	Faeth	mg g-1 CWR	1.25	0.32	3.19303e-29		10.43	0.66	4.61613e-149		4.71	-0.38	4.69817e-42
Structural sugars	CL.NDF	%NDF	5.18	0.64	8.04322e-141		5.38	-0.47	1.60344e-67		3.28	0.32	4.68229e-29
	GLU	%CWR	5.65	0.67	4.21292e-158		2.26	0.31	2.20636e-27		8.33	0.5	9.21726e-78
	HC.NDF	%NDF	8.3	-0.82	3.54143e-285		3.58	0.39	1.34226e-43		0.79	-0.16	6.79967e-08
	ARA	%CWR	10.22	-0.9	0		2	0.29	2.59651e-24		0.07	0.05	ns
	GAL	%CWR	7.38	-0.77	9.28776e-234		3.64	0.39	2.31551e-44		0.23	-0.08	0.0039788
	XYL	%CWR	0.45	0.19	2.93775e-11		4.3	0.42	6.1006e-53		4.45	0.37	1.24489e-39
aNDF, neutral detergent fiber; IVDMD, in vitro dry matter degradability; IVCWRD, in vitro cell wall residus degradability; ADL, acid detergent lignin; KL, Klason lignin; PCA, para-coumaric acid; FA, ferulic acid; CL, cellulose; HC, hemicellulose; GLU, glucose; ARA, arabinose; GAL, galactose; XYL, xylose.
